# Supplementary material
Source: HighWire-hosted journal article supplement (https://heart.bmj.com/content/107/4/299)
Supplement: inline-supplementary-material-1 [file inline-supplementary-material-1.pdf]

1 **SUPPLEMENTAL METHODS & RESULTS**

2 **Effect of coronary flow on intracoronary alteplase, a pre-specified**

3 **analysis from a randomised trial**

4 ClinicalTrials.gov: NCT02257294

5

6 **Contents**

|                                                                                                                                                                                                                                                        |         |
|--------------------------------------------------------------------------------------------------------------------------------------------------------------------------------------------------------------------------------------------------------|---------|
| <b>Eligibility Criteria</b>                                                                                                                                                                                                                            | Page 3  |
| <b>Standard Care</b>                                                                                                                                                                                                                                   | Page 6  |
| <b>Interventions</b>                                                                                                                                                                                                                                   | Page 6  |
| <b>Angiogram Acquisition and Analysis Methods</b>                                                                                                                                                                                                      | Page 6  |
| <b>CMR Acquisition and Analysis Methods</b>                                                                                                                                                                                                            | Page 9  |
| <b>Local Hospital Blood Sample Handling</b>                                                                                                                                                                                                            | Page 11 |
| <b>Central Laboratory Analysis for Troponin T</b>                                                                                                                                                                                                      | Page 11 |
| <b>Central Laboratory Analysis for Coagulation Parameters</b>                                                                                                                                                                                          | Page 12 |
| <b>Trial Management</b>                                                                                                                                                                                                                                | Page 13 |
| <b>Supplemental Table 1.</b> Additional procedure characteristics, by subgroups of TIMI flow grade ( $\leq 2$ vs. 3) immediately before study drug administration.                                                                                     | Page 15 |
| <b>Supplemental Table 2.</b> Analysis of CMR derived LV end-diastolic and end-systolic volumes, by subgroups of TIMI flow grade ( $\leq 2$ vs. 3) immediately before study drug administration (adjusted for MI location [anterior vs. non-anterior]). | Page 16 |
| <b>Supplemental Table 3.</b> Analysis of CMR parameters 2-7 days after primary PCI, by subgroups of TIMI flow grade ( $\leq 2$ vs. 3) immediately before study drug administration, and by subgroups of MI location.                                   | Page 17 |
| <b>Supplemental Table 4.</b> Baseline characteristics according to availability of MVO data (complete vs. missing).                                                                                                                                    | Page 20 |

|                                                                                                                                                                                                                                                                                                                                |         |
|--------------------------------------------------------------------------------------------------------------------------------------------------------------------------------------------------------------------------------------------------------------------------------------------------------------------------------|---------|
| <b>Supplemental Table 5.</b> Procedure characteristics according to availability of MVO data<br>(complete vs. missing).                                                                                                                                                                                                        | Page 22 |
| <b>Supplemental Table 6.</b> Analysis of CMR parameters 2–7 days after primary PCI, by subgroups of<br>TIMI flow grade (2 vs. 3) immediately before study drug administration (adjusted for MI location<br>[anterior vs. non-anterior]).                                                                                       | Page 24 |
| <b>Supplemental Table 7.</b> Analysis of MVO extent (% LV mass) 2-7 days after primary PCI,<br>by subgroups of TIMI flow grade ( $\leq 2$ vs. 3) immediately before study drug<br>administration, with treatment effects derived by bootstrapping (10,000 replicates,<br>stratified by the location of myocardial infarction). | Page 25 |
| <b>Supplemental Table 8.</b> Analysis of electrocardiographic, biochemical and angiographic<br>parameters, by subgroups of TIMI flow grade ( $\leq 2$ vs. 3) immediately before study drug<br>administration (adjusted for MI location [anterior vs. non-anterior]).                                                           | Page 26 |
| <b>Supplemental Table 9.</b> Analysis of coagulation variables, at 2 hours, at 24 hours, and at 24<br>hours compared to baseline, by subgroups of TIMI flow grade ( $\leq 2$ vs. 3) immediately before<br>study drug administration (adjusted for MI location [anterior vs. non-anterior]).                                    | Page 28 |
| <b>References</b>                                                                                                                                                                                                                                                                                                              | Page 31 |

## 8 Eligibility Criteria

9 Patients with a clinical diagnosis of acute ST-segment elevation myocardial infarction (STEMI) were  
10 eligible for randomisation according to the following eligibility criteria:

### 11 *Inclusion*

- 12 • Acute MI (symptom onset  $\leq 6$  hours) with persistent ST-segment elevation or recent left bundle  
13 branch block
- 14 • Coronary artery occlusion (TIMI [Thrombolysis in Myocardial Infarction] coronary flow grade  
15 0 or 1), or impaired coronary flow (TIMI coronary flow grade 2, slow but complete filling) in  
16 the presence of definite angiographic evidence of thrombus (TIMI grade 2 or more)
- 17 • Proximal-mid culprit lesion location in a major coronary artery (i.e. the right, left anterior  
18 descending, intermediate, or circumflex artery)
- 19 • Radial artery access
- 20 • Successful coronary reperfusion (TIMI coronary flow grade  $\geq 2$ ) pre-stent achieved prior to  
21 randomisation.
- 22 • Informed consent, i.e. only patients who were sufficiently well to understand the information  
23 about the study, as described by the attending cardiologist, were eligible to participate.

### 24 *Exclusion*

- 25 • Normal flow in the culprit coronary artery at initial angiography (TIMI grade 3)
- 26 • Functional coronary collateral supply (Rentrop grade 2/3) to the culprit artery
- 27 • Previous infarction in the culprit artery (known or suspected clinically, e.g. wall motion  
28 abnormality revealed by echocardiography)
- 29 • Cardiogenic shock (Killip Class IV)
- 30 • Multivessel percutaneous coronary intervention (PCI) intended before the day 2-7  
31 cardiovascular magnetic resonance (CMR) scan
- 32 • Estimated body weight  $< 60$  kg

- 33 • Non-cardiac co-morbidity with expected survival <1 year
- 34 • Contra-indication to contrast-enhance CMR imaging
- 35 • Pacemaker, or implantable defibrillator
- 36 • Known impaired renal function (estimated glomerular filtration rate <30ml/min)
- 37 • Significant bleeding disorder either at present or within the past 6 months
- 38 • Known haemorrhagic diathesis
- 39 • Patient with current concomitant oral anticoagulation therapy (international normalised ratio
- 40 >1.3), including apixaban, dabigatran and rivaroxaban
- 41 • Any history of central nervous system damage (i.e. neoplasm, aneurysm, intracranial or spinal
- 42 surgery)
- 43 • Severe hypertension (blood pressure >180/110 mmHg) not controlled by medical therapy
- 44 • Major surgery, biopsy of a parenchymal organ, or significant trauma within the past 3 months
- 45 (this includes any trauma associated with the current acute MI)
- 46 • Recent head trauma (<2 months)
- 47 • Prolonged cardiopulmonary resuscitation (>2 minutes) within the past 2 weeks
- 48 • Acute pericarditis and/ or subacute bacterial endocarditis
- 49 • Acute pancreatitis
- 50 • Severe hepatic dysfunction, including hepatic failure, cirrhosis, portal hypertension
- 51 (oesophageal varices) and active hepatitis
- 52 • Active peptic ulceration
- 53 • Arterial aneurysm and known arterial/ venous malformation
- 54 • Neoplasm with increased bleeding risk
- 55 • Any known history of haemorrhagic stroke, or stroke of unknown origin
- 56 • Known history of ischaemic stroke, or transient ischemic attack in the preceding 6 months
- 57 • Dementia

- 58 • Hypersensitivity to gentamicin, or natural rubber
- 59 • Incapacity, or inability to provide informed consent
- 60 • Previous randomisation to this study, or participation in a study with an investigational drug, or
- 61 medical device within 90 days prior to randomisation
- 62 • Women of child bearing potential (i.e. pre-menopausal), or breast feeding
- 63 • Requirement for immunosuppressive therapy at any time during the preceding 3 months. This
- 64 would include corticosteroids (but not inhaled or topical), drugs used following transplantation
- 65 (e.g tacrolimus, cyclosporine), anti-metabolite therapies (e.g. mycophenolic acid, azathioprine,
- 66 leflunomide and immunomodulators including biologics (e.g. adalimumab, or etanercept) and
- 67 disease modifying anti-rheumatic drugs. This list is not exhaustive.
- 68 • Active or prophylactic treatment with oral, or parenteral antibiotic, antifungal, or antiviral
- 69 therapy, to prevent or treat infection
- 70 • Any anti-cancer treatment (excluding surgery as this is covered above) at any time during the
- 71 preceding 3 months, including chemotherapy, radiotherapy, and treatment with biologics, such
- 72 as Vascular Endothelial Growth Factor Receptor (VEGFR) inhibitors (e.g. bevacizumab,
- 73 pazopanib). This list is not exhaustive.
- 74 • Any significant concurrent, or recent condition(s) not listed above that in the opinion of the
- 75 treating clinician would pose an additional risk to the patient.

76  
77  
78  
79  
80  
81  
82

### 83     **Standard Care**

84             Standard care for coronary reperfusion was with balloon angioplasty, or aspiration  
85     thrombectomy for thrombus-containing lesions. A coronary balloon diameter (mm) vs. lumen diameter  
86     (mm) relationship of <1:1 and a low inflation pressure were recommended to minimise thrombus  
87     embolization. The balloon angioplasty was intended to stabilise the thrombotic lesion and prevent vessel  
88     re-occlusion prior to stent implantation. Anti-thrombotic therapy included oral anti-platelet drugs and  
89     intravenous heparin (5000 IU, or as per standard practice) at the first medical contact. The target  
90     activated clotting time (ACT) was 250s.

### 91     **Interventions**

92             After initial balloon angioplasty/ thrombus aspiration, the participants were randomised using  
93     an interactive voice response-based system, and then received the allocated intervention. The study drug  
94     (placebo, alteplase 10mg, or alteplase 20mg) was manually infused before stent implantation. The drug  
95     was reconstituted by the clinical staff using 20ml of sterile water for injection. The cardiologist then  
96     infused the solubilised drug over 5-10 minutes directly into the culprit artery, proximal to the culprit  
97     lesions, using either an intracoronary catheter or the guiding catheter if selectively engaged.

### 98     **Angiogram Acquisition & Analysis Methods**

99             Coronary angiograms were acquired during emergency care with cardiac catheter laboratory X-  
100     ray and information technology equipment. The angiograms were analysed using post-processing  
101     software (QAngio® XA Medis, Leiden, NL.) by experienced investigators who were blinded to  
102     treatment allocation. Catheter calibration was performed using the catheter calibration function on  
103     MEDIS QAngio. For each lesion, a view perpendicular to the long axis of the vessel was used in order  
104     to avoid foreshortening and overlap of branches. The single plane projection showing the best opacified  
105     and most severe lesion with minimal foreshortening and minimal branch overlap was selected.  
106     Feedback was provided to sites on the quality and completeness of the angiograms.  
107

108 ***TIMI Coronary Flow Grade***

109 The TIMI coronary flow grade was assessed using the following definitions(1):

| TIMI coronary flow grade | Definition                                     |
|--------------------------|------------------------------------------------|
| 0                        | No flow                                        |
| 1                        | Minimal flow past obstruction                  |
| 2                        | Slow (but complete) filling and slow clearance |
| 3                        | Normal flow and clearance                      |

110

111 ***TIMI Myocardial Perfusion Grade***

112 TIMI myocardial perfusion grade provides a score for ground-glass appearance ('blush') of the

113 contrast entering the microvasculature and contrast washout. TIMI myocardial perfusion grade was

114 assessed according to the following definitions(2):

| TIMI myocardial perfusion grade | Definition                                                                                                                                                                                                                                                                                                                                                          |
|---------------------------------|---------------------------------------------------------------------------------------------------------------------------------------------------------------------------------------------------------------------------------------------------------------------------------------------------------------------------------------------------------------------|
| 0                               | Minimal or no myocardial blush in the distribution of the culprit artery.                                                                                                                                                                                                                                                                                           |
| 1                               | Myocardial blush is present in the distribution of the culprit artery. But there is incomplete clearance of dye between injections (with ~ 30 seconds between injections).                                                                                                                                                                                          |
| 2                               | Myocardial blush is present in the distribution of the culprit artery. But there is slow contrast entry into the microvasculature and slow clearance of contrast. Specifically, blush is strongly persistent (i.e. either does not or only minimally diminishes in intensity) beyond 3 cardiac cycles after injection.                                              |
| 3                               | Myocardial blush is present in the distribution of the culprit artery, with normal entry and exit of dye (mild/ moderate persistence of dye beyond 3 cardiac cycles, but notably reduced after 3 cardiac cycles). Blush that is only mild intensity throughout 3 cardiac cycles after injection (washout phase), but fades minimally is also classified as grade 3. |

115

116 **TIMI Frame Count**

117 The TIMI frame count represents the amount of time (in frames) for contrast dye to reach  
118 a standardized distal landmark.(2) If the culprit vessel was the left anterior descending artery  
119 the frame count was divided by 1.7 (correcting for longer vessel length).

120 **TIMI Coronary Thrombus Grade**

121 Thrombus burden revealed during coronary angiography was classified according to the  
122 TIMI thrombus grade(3):

| Thrombus grade | Definition                                                                                                                                                                                              |
|----------------|---------------------------------------------------------------------------------------------------------------------------------------------------------------------------------------------------------|
| 0              | No angiographic characteristics of thrombus are present                                                                                                                                                 |
| 1              | Possible thrombus is present, with reduced contrast density, haziness, irregular lesion contour, or a smooth convex ‘meniscus’ at the site of total occlusion suggestive but not diagnostic of thrombus |
| 2              | Definite thrombus, with greatest dimensions ≤ half the vessel diameter                                                                                                                                  |
| 3              | Definite thrombus but with greatest long axis dimension >1/2 but <2 vessel diameters                                                                                                                    |
| 4              | Definite thrombus, with the largest dimension ≥2 vessel diameters                                                                                                                                       |
| 5              | Total occlusion                                                                                                                                                                                         |

124 **Lesion Characterisation**

125 The culprit lesions were assessed for complexity using the modified American College of  
126 Cardiology/ American Heart Association score, which characterises coronary lesions as type  
127 A, B1 (one characteristic of a type B lesion), B2 (two or more characteristics of a type B  
128 lesion) and C.(4)

129 The culprit lesions were also assessed for complexity using a 6-point plaque  
130 characterisation score,(5) comprising:



- 131 (i) Intraluminal filling defect consistent with thrombus
- 132 (ii) Ulcerated appearance, for example hazy contour, and/ or apple-core appearance
- 133 (iii) Irregularity of vessel borders
- 134 (iv) TIMI flow <3 beyond the lesion
- 135 (v) Moderate to severe calcification, i.e. calcification in more than one cine, outlining
- 136 the full lumen
- 137 (vi) Lesion at a bifurcation point

### 138 **CMR Acquisition and Analysis**

139 CMR was performed using 1.5-T platforms (Siemens MAGNETOM Avanto,  
140 Erlangen, Germany and Philips Intera, Best, The Netherlands). The imaging protocol  
141 followed a standard operating procedure that included planning and localisers, T1-mapping,  
142 T2\*-mapping, cine CMR with steady-state free precession (SSFP), and late gadolinium  
143 enhancement imaging 10 – 15 minutes after administration of contrast media.(6) The scan  
144 acquisitions were spatially co-registered and also included different slice orientations to  
145 enhance diagnostic confidence.

146 The intravenous contrast agent used in this study was gadobutrol (Gadovist®, Bayer:  
147 1.5 mmol/ml solution for injection), which was administered in two doses. The first dose  
148 injection (0.05 mmol/kg) was given to initiate the first-pass of contrast. The second dose (0.1  
149 mmol/kg) was given immediately after the first-pass. Therefore, the total dose of gadobutrol  
150 was 0.15 mmol/kg.

151 SSFP cine breath-hold sequences (with parallel imaging acceleration) were used. The  
152 heart was imaged in multiple parallel SAX planes 8-mm thick, separated by 2mm gaps,  
153 equating to approximately 10 slices and 30 cardiac phases. The CMR analyses were  
154 undertaken using Medis® Suite MR (Medis, Leiden, NL), by two trained investigators who  
155 were blinded to treatment allocation.

### **Late Gadolinium Enhancement**

Late microvascular obstruction (MVO) was imaged 10-15 minutes after intravenous Gadovist contrast administration, using in general a motion corrected T1-weighted phase-sensitive inversion recovery radiofrequency pulse sequence. A full stack, aligned to T2\* scans (or cines) and 3 long axis views (vertical long axis, horizontal long axis and 3 chamber view) were acquired.

MVO was defined as a dark zone on early gadolinium enhancement imaging 1, 3, 5 and 7-minutes post-contrast injection that remained present within an area of late gadolinium enhancement at 15 minutes. The endocardial and epicardial borders were contoured. The myocardial mass (grams) of the dark zone was quantified by manual delineation and expressed as a percentage of total left ventricular (LV) mass.

### **Infarct Size**

The presence of acute infarction was established based on abnormalities in cine wall motion, rest first-pass myocardial perfusion, and late gadolinium enhancement imaging in two imaging planes. The myocardial mass of late gadolinium (grams) was quantified using computer assisted planimetry and the territory of infarction was delineated using a 5 standard deviation method and expressed as a percentage of total LV mass. Typical late gadolinium enhancement and MVO imaging parameters with phase sensitive inversion recovery: matrix 192 x 256 pixels; flip angle 25°; TE 3.36 ms; bandwidth 130 Hz/pixel; echo spacing 8.7ms and trigger pulse 2. The voxel size is 1.8 x 1.3 x 8 mm. Inversion times individually adjusted to optimize nulling of apparently normal myocardium (typical values, 200 to 300ms).

### **Myocardial Oedema**

The presence of myocardial oedema was established based on an area of increased signal intensity on the SSFP cine images (acquired two minutes after gadolinium contrast

injection). The myocardial mass was calculated by manual delineation in end-diastole and end-systole. The values were averaged and expressed as a percentage of LV mass.(6)

### ***Myocardial Salvage***

Myocardial salvage was calculated by subtraction of percent infarct size from percent area-at risk, as reflected by the extent of oedema. The myocardial salvage index was calculated by dividing the myocardial salvage area by the initial area-at-risk.

### ***Myocardial Haemorrhage***

On the T2\* parametric maps, a threshold of 20ms was applied. A region of reduced signal intensity within the infarcted area, with a T2\* value of <20 ms(7)(8) was considered to confirm the presence of myocardial haemorrhage. The area was manually delineated and expressed as % LV mass.

### **Local Hospital Blood Sample Handling**

Blood samples were measured when site logistics permitted. The sampling time-points were 0, 2 and 24 hours post-PCI. Blood samples were collected into 0.109M sodium citrate (for haemostasis assays), or EDTA (Troponin). The blood samples were centrifuged locally and plasma separated and frozen within 2 hours of sampling. Frozen plasma samples were subsequently transported on dry ice for central laboratory analysis in the department of Haematology, Macewan Building, 16 Alexandra Parade, Glasgow Royal Infirmary, G31 2ER. Plasma samples were stored at -80°C until analysis, with residual samples being transferred to the Glasgow Biorepository for storage at the end of the study.

### **Central Laboratory Analysis for Troponin T**

EDTA plasma samples were stored at -80°C in the Glasgow Royal Infirmary until batch analysis at the end of the study. The biochemical analyses were performed in the British Heart Foundation Glasgow Cardiovascular Research Centre.

EDTA plasma samples were stored to analyse high-sensitivity cardiac troponin T (ng/ml) on first thaw. Serial measurements of troponin T using the Roche high-sensitivity assay were used to provide a biochemical measurement of infarct size (area-under-the-curve).

For measurement of high sensitivity cardiac troponin T, we used an automated method (e411, Roche Diagnostic, Burgess Hill, U.K.) calibrated and quality controlled using the manufacturers reagents. We also participated in the National External Quality Assurance Scheme (NEQAS). The lower limit of detection of Troponin T is 0.003 ng/ml and the 99<sup>th</sup> percentile value in a healthy subpopulation is 0.0014 ng/ml (Roche Diagnostics, data on file). The between-assay coefficient of variations were 2.2% and 4.2% for control materials with mean Troponin T concentrations of 2.098 ng/ml and 0.00027 ng/ml, respectively.

#### **Central Laboratory Analysis for Coagulation Parameters**

The coagulation parameters measured in this study included fibrinogen and plasminogen (both measures of coagulation and systemic fibrinolysis), fibrin D-Dimer (a measure of fibrin lysis), tissue plasminogen activator (tPA) (a measure of endogenous tPA and any circulating alteplase) and prothrombin fragment F1+2 (a measure of thrombin activation). A depletion of fibrinogen and plasminogen following thrombolysis correlates with systemic fibrinolysis and may correlate with bleeding risk. Prothrombin fragment F1+2 is a measure of thrombin activation and correlate with the (undesired) procoagulant effect of thrombolysis. Prothrombin fragment F1+2 is depressed by anti-coagulants administered before and during PCI.

Standard laboratory assays (Fibrinogen by Clauss method; high sensitivity Fibrin D-Dimer by latex immunoassay; and Plasminogen Activity by chromogenic assay were performed on an IL TOP700 analyser using HemosIL<sup>®</sup> reagents (Instrumentation Laboratory Company, Bedford, U.S.). The fibrinogen Clauss assay had a normal reference ranges 170 – 4.0 g/L (internally derived) and an inter-assay coefficient of variation of 5.8% and 7.7% for

low control samples with mean concentrations of 2.92 g/L and 2.22 g/L respectively. The fibrin D-Dimer assay had a normal reference range <0.230 µg/ml (manufacturer derived), and an inter-assay coefficient of variation of 11.7% and 5.2% for control samples with mean concentrations of 0.343 µg/ml and 0.770 µg/ml respectively. The plasminogen activity assay had a normal reference range 80 – 133 U/dL (manufacturer derived), and an inter-assay coefficient of variation of 2.1% and 1.8% for control samples with mean concentrations of 95.4 U/dL and 29.6 U/dL, respectively.

Non-standard laboratory ELISA assays (tissue plasminogen activator [tPA] and Prothrombin fragment F1+2 antigen levels) were performed on a TECAN Sunrise spectrophotometer (Labtech International Ltd, U.K.) using Zymutest tPA Antigen (Hyphen BioMed, Neuville-sur-oise France) and Enzygnost F1+2 Mono (Siemens, Marburg, Germany) commercial kits respectively. The tPA antigen assay had a normal reference range <10 ng/ml (manufacturer derived), and an inter-assay coefficient of variation of 4.7% and 11% for control samples with mean concentrations of 11.0 ng/ml and 3.1 ng/ml, respectively. The F1+2 assay had a normal reference range 69 – 229 pmol/L (manufacturer derived) and an inter-assay coefficient of variation of 7.9% for a normal control sample with a mean concentration of 97.6 pmol/L.

#### **Trial Management**

There was a Trial Management Group for operational activity, an independent Data and Safety Monitoring Committee and a Trial Steering Committee to coordinate the trial and liaise with the Sponsor and Trials Unit. Each committee had a charter that was established before enrolment started.

The independent Data and Safety Monitoring Committee met before the enrolment began, and twice again during the active phase of the trial. This committee had responsibility for potentially recommending early discontinuation of the entire study or an individual arm,

254 because of safety concerns or due to futility. The funder, the Efficacy and Mechanism  
255 Evaluation (EME) program of the National Institute for Health Research (NIHR) required an  
256 interim analysis for futility and also specified the criteria. Following a prespecified futility  
257 analysis, performed when 40% of the trial population had reached 3 months follow-up, the  
258 Data and Safety Monitoring Committee recommended that enrolment into the T-TIME trial  
259 should be discontinued on December 21 2017.

260 The Robertson Centre for biostatistics within the Glasgow Clinical Trials Unit  
261 provided the trial-specific electronic data collection system, acted as an independent  
262 coordination centre for randomisation and data management. The trial was approved by the  
263 National Research Ethics Service (reference 13/WS/0119). The clinical trial registration  
264 number is NCT02257294 and the trial was co-sponsored by the University of Glasgow and  
265 greater Glasgow and Clyde Health Board, NHS Scotland. The sponsor undertook feasibility  
266 assessments at each site, visits were undertaken in all of the sites. All serious adverse events  
267 were prospectively reported to the Pharmacovigilance Unit.

**Supplemental Table 1. Additional procedure characteristics, by subgroups of TIMI flow grade ( $\leq 2$  vs. 3) immediately before study drug administration. Data are reported according to treatment received (n=421). Data are mean  $\pm$  SD, or n (%).**

|                                                   | Impaired coronary flow (TIMI flow $\leq 2$ ) |                   |                          |                          | Normal coronary flow (TIMI 3 flow) |                   |                          |                          |
|---------------------------------------------------|----------------------------------------------|-------------------|--------------------------|--------------------------|------------------------------------|-------------------|--------------------------|--------------------------|
|                                                   | All<br>(n=154)                               | Placebo<br>(n=50) | Alteplase 10mg<br>(n=49) | Alteplase 20mg<br>(n=55) | All<br>(n=267)                     | Placebo<br>(n=92) | Alteplase 10mg<br>(n=87) | Alteplase 20mg<br>(n=88) |
| American Heart Association culprit lesion type: * |                                              |                   |                          |                          |                                    |                   |                          |                          |
| B2                                                | 42 (27%)                                     | 13 (26%)          | 15 (31%)                 | 14 (26%)                 | 62 (23%)                           | 17 (19%)          | 20 (23%)                 | 25 (28%)                 |
| C                                                 | 112 (73%)                                    | 37 (74%)          | 34 (69%)                 | 41 (75%)                 | 205 (77%)                          | 75 (82%)          | 67 (77%)                 | 63 (72%)                 |
| Culprit lesion plaque characterisation score: † * |                                              |                   |                          |                          |                                    |                   |                          |                          |
| 2                                                 | 1 (1%)                                       | 0                 | 1 (2%)                   | 0                        | 3 (1%)                             | 1 (1%)            | 2 (2%)                   | 0                        |
| 3                                                 | 20 (13%)                                     | 5 (10%)           | 6 (12%)                  | 9 (16%)                  | 76 (29%)                           | 27 (29%)          | 26 (30%)                 | 23 (26%)                 |
| 4                                                 | 115 (75%)                                    | 40 (80%)          | 35 (71%)                 | 40 (73%)                 | 164 (61%)                          | 54 (59%)          | 53 (61%)                 | 57 (65%)                 |
| 5                                                 | 17 (11%)                                     | 4 (8%)            | 7 (14%)                  | 6 (11%)                  | 24 (9%)                            | 10 (11%)          | 6 (7%)                   | 8 (9%)                   |
| 6                                                 | 1 (1%)                                       | 1 (2%)            | 0                        | 0                        | 0                                  | 0                 | 0                        | 0                        |
| QCA lesion length pre-drug (mm) *                 | 25.5 $\pm$ 11.2                              | 26.7 $\pm$ 11.6   | 27.4 $\pm$ 12.4          | 22.7 $\pm$ 9.3           | 27.2 $\pm$ 11.3                    | 26.7 $\pm$ 10.6   | 27.6 $\pm$ 11.6          | 27.5 $\pm$ 11.8          |
| Total number of stents deployed:                  |                                              |                   |                          |                          |                                    |                   |                          |                          |
| 0                                                 | 2 (1%)                                       | 0                 | 1 (2%)                   | 1 (2%)                   | 1 (0.0%)                           | 1 (1%)            | 0                        | 0                        |
| 1                                                 | 104 (68%)                                    | 35 (70%)          | 29 (59%)                 | 40 (73%)                 | 188 (70%)                          | 59 (64%)          | 65 (75%)                 | 64 (73%)                 |
| 2                                                 | 40 (26%)                                     | 13 (26%)          | 14 (29%)                 | 13 (24%)                 | 64 (24%)                           | 30 (33%)          | 14 (16%)                 | 20 (23%)                 |
| $\geq 3$                                          | 8 (5%)                                       | 2 (4%)            | 5 (10%)                  | 1 (2%)                   | 14 (5%)                            | 2 (2%)            | 8 (9%)                   | 4 (5%)                   |

\* The angiographic parameters are based on central laboratory assessments.

† The plaque characterisation score comprised one point for each of: intraluminal thrombus, ulceration, irregularity of vessel borders, TIMI flow  $< 3$  beyond the lesion, moderate-severe calcification and bifurcation.

Abbreviations: QCA, quantitative coronary angiography.

**Supplemental Table 2. Analysis of CMR derived LV end-diastolic and end-systolic volumes, by subgroups of TIMI flow grade ( $\leq 2$  vs. 3) immediately before study drug administration (adjusted for MI location [anterior vs. non-anterior]). Data are median [IQR].**

| Treatment Group                           |                               |                               |                           | Treatment Effect                 |                                         | Interaction<br>p-value<br>(treatment<br>as a 3-level<br>categorical<br>variable) | Treatment Effect                                                  | Interaction |
|-------------------------------------------|-------------------------------|-------------------------------|---------------------------|----------------------------------|-----------------------------------------|----------------------------------------------------------------------------------|-------------------------------------------------------------------|-------------|
| Placebo<br>(n=142)*                       | Alteplase<br>10mg<br>(n=136)* | Alteplase<br>20mg<br>(n=143)* | Alteplase 10mg vs placebo | Alteplase 20mg vs. placebo       | Alteplase (10mg or 20mg)<br>vs. placebo |                                                                                  | p-value<br>(treatment<br>as a 2-level<br>categorical<br>variable) |             |
|                                           |                               |                               | Estimate (95% CI) p-value | Estimate (95% CI) p-value        | Estimate (95% CI), p-value              |                                                                                  |                                                                   |             |
| CMR parameters 2-7 days after primary PCI |                               |                               |                           |                                  |                                         |                                                                                  |                                                                   |             |
| LV end-diastolic volume (ml)              |                               |                               |                           |                                  |                                         |                                                                                  |                                                                   |             |
| TIMI flow ≤2                              | 174.2 [153.9, 214.1]          | 177.3 [163.9, 212.3]          | 161.6 [142.6, 200.0]      | 1.02 (0.93, 1.12) p=0.721        | 0.94 (0.86, 1.03) p=0.171               | 0.340                                                                            | 0.97 (0.90, 1.06) p=0.525                                         | 0.141       |
| TIMI 3 flow                               | 162.2 [141.8, 190.1]          | 176.5 [155.5, 205.8]          | 170.5 [136.6, 194.3]      | 1.08 (1.01, 1.16) <b>p=0.021</b> | 1.02 (0.95, 1.09) p=0.601               |                                                                                  | 1.05 (0.99, 1.11) p=0.105                                         |             |
| LV end-systolic volume (ml)               |                               |                               |                           |                                  |                                         |                                                                                  |                                                                   |             |
| TIMI flow ≤2                              | 96.2 [80.2, 118.9]            | 105.3 [85.6, 124.3]           | 95.5 [80.8, 113.6]        | 0.0 (-0.85, 0.86) p=0.993        | 0.73 (-0.08, 1.54) p=0.080              | 0.261                                                                            | 0.40 (-0.32, 1.13) p=0.277                                        | 0.284       |
| TIMI 3 flow                               | 90.2 [75.9, 108.0]            | 92.9 [79.0, 113.5]            | 92.5 [72.3, 109.0]        | -0.12 (-0.80, 0.57) p=0.738      | -0.10 (-0.80, 0.60) p=0.778             |                                                                                  | -0.11 (-0.70, 0.49) p=0.72                                        |             |
| CMR parameters 3 months after primary PCI |                               |                               |                           |                                  |                                         |                                                                                  |                                                                   |             |
| LV end-diastolic volume (ml)              |                               |                               |                           |                                  |                                         |                                                                                  |                                                                   |             |
| TIMI flow ≤2                              | 170.2 [158.8, 207.1]          | 170.0 [152.9, 206.4]          | 174.0 [150.5, 195.1]      | 1.01 (0.91, 1.12) p=0.796        | 0.95 (0.86, 1.05) p=0.349               | 0.567                                                                            | 0.98 (0.90, 1.07) p=0.673                                         | 0.281       |
| TIMI 3 flow                               | 157.9 [138.9, 188.5]          | 173.6 [153.7, 205.6]          | 162.9 [140.4, 194.3]      | 1.08 (1.00, 1.16) <b>p=0.045</b> | 1.01 (0.94, 1.08) p=0.847               |                                                                                  | 1.04 (0.98, 1.11) p=0.213                                         |             |
| LV end-systolic volume (ml)               |                               |                               |                           |                                  |                                         |                                                                                  |                                                                   |             |
| TIMI flow ≤2                              | 81.6 [72.8, 114.7]            | 88.9 [71.4, 116.5]            | 92.1 [71.5, 110.1]        | 1.03 (0.88, 1.20) p=0.729        | 0.99 (0.85, 1.15) p=0.878               | 0.762                                                                            | 1.01 (0.88, 1.15) p=0.923                                         | 0.508       |
| TIMI 3 flow                               | 77.5 [60.7, 99.5]             | 85.9 [71.7, 103.3]            | 78.5 [65.8, 102.1]        | 1.10 (0.99, 1.23) p=0.085        | 1.03 (0.92, 1.15) p=0.640               |                                                                                  | 1.06 (0.97, 1.17) p=0.210                                         |             |

Data analysed on a logarithmic scale. Treatment effect estimates reported as relative difference between groups.  
The p values and 95% CI have not been adjusted for multiplicity, therefore these analyses should be interpreted as exploratory and not definitive.  
\* Missing data: LV volumes 2 – 7 days after primary PCI (n=34), LV volumes 3 months after primary PCI (n=63).  
\* Missing data: LV volumes 2 – 7 days after primary PCI (n=34), LV volumes 3 months after primary PCI (n=63).



**Supplemental Table 3. Analysis of selected CMR parameters 2-7 days after primary PCI, by subgroups of TIMI flow grade ( $\leq 2$  vs. 3) immediately before study drug administration, and by subgroups of MI location (anterior [n=187], non-anterior [n=234]). Treatment effect estimates and interaction with treatment received are shown (see footnotes). Data are mean  $\pm$  SD, or n (%), unless otherwise stated.**

|                                                       |              | Treatment Group     |                               |                               | Treatment Effect                  |                                  | Interaction<br>p-value<br>(treatment<br>as a 3-level<br>categorical<br>variable) | Treatment Effect                        | Interaction<br>p-value<br>(treatment<br>as a 2-level<br>categorical<br>variable) |
|-------------------------------------------------------|--------------|---------------------|-------------------------------|-------------------------------|-----------------------------------|----------------------------------|----------------------------------------------------------------------------------|-----------------------------------------|----------------------------------------------------------------------------------|
|                                                       |              | Placebo<br>(n=142)* | Alteplase<br>10mg<br>(n=136)* | Alteplase<br>20mg<br>(n=143)* | Alteplase 10mg vs placebo         | Alteplase 20mg vs. placebo       |                                                                                  | Alteplase (10mg or 20mg)<br>vs. placebo |                                                                                  |
|                                                       |              |                     |                               |                               | Estimate (95% CI) p-value         | Estimate (95% CI) p-value        |                                                                                  | Estimate (95% CI), p-value              |                                                                                  |
| <b>MVO presence (n/ total) (a)</b>                    |              |                     |                               |                               |                                   |                                  |                                                                                  |                                         |                                                                                  |
| <i>Anterior-MI:</i>                                   | TIMI flow ≤2 | 8/23 (34.8)         | 11/22 (50.0)                  | 15/27 (55.6)                  | 1.88 (0.57, 6.21) p=0.304         | 2.34 (0.75, 7.37) p=0.145        | 0.354                                                                            | 2.12 (0.77, 6.13) p=0.151               | 0.150                                                                            |
|                                                       | TIMI 3 flow  | 19/36 (52.8)        | 16/34 (47.1)                  | 15/31 (48.4)                  | 0.80 (0.31, 2.03) p=0.633         | 0.84 (0.32, 2.19) p=0.720        |                                                                                  | 0.82 (0.36, 1.84) p=0.625               |                                                                                  |
| <i>Non-anterior MI:</i>                               | TIMI flow ≤2 | 7/21 (33.3)         | 14/20 (70.0)                  | 11/22 (50.0)                  | 4.67 (1.25, 17.44) <b>p=0.022</b> | 2.00 (0.58, 6.87) p=0.271        | <b>0.014</b>                                                                     | 2.94 (0.98, 8.81) p=0.054               | <b>0.012</b>                                                                     |
|                                                       | TIMI 3 flow  | 22/49 (44.9)        | 13/46 (28.3)                  | 18/52 (34.6)                  | 0.48 (0.21, 1.14) p=0.095         | 0.65 (0.29, 1.45) p=0.292        |                                                                                  | 0.57 (0.28, 1.15) p=0.116               |                                                                                  |
| <b>MVO extent (% LV mass)† (b)</b>                    |              |                     |                               |                               |                                   |                                  |                                                                                  |                                         |                                                                                  |
| <i>Anterior-MI:</i>                                   | TIMI flow ≤2 | 3.7 ± 7.4           | 2.5 ± 3.4                     | 6.3 ± 8.0                     | 0.0 (-0.85, 0.86) p=0.993         | 0.73 (-0.08, 1.54) p=0.080       | 0.261                                                                            | 0.40 (-0.32, 1.13) p=0.277              | 0.284                                                                            |
|                                                       | TIMI 3 flow  | 3.0 ± 4.1           | 2.9 ± 4.6                     | 3.1 ± 5.6                     | -0.12 (-0.80, 0.57) p=0.738       | -0.10 (-0.80, 0.60) p=0.778      |                                                                                  | -0.11 (-0.70, 0.49) p=0.72              |                                                                                  |
| <i>Non-anterior MI:</i>                               | TIMI flow ≤2 | 1.4 ± 2.9           | 3.1 ± 4.5                     | 4.2 ± 6.5                     | 0.65 (-0.07, 1.37) p=0.079        | 0.71 (0.00, 1.41) p=0.050        | 0.156                                                                            | 0.68 (0.07, 1.29) p=0.031               | 0.053                                                                            |
|                                                       | TIMI 3 flow  | 1.5 ± 2.6           | 2.1 ± 4.9                     | 1.8 ± 3.3                     | -0.07 (-0.54, 0.40) p=0.775       | -0.02 (-0.48, 0.44) p=0.922      |                                                                                  | -0.04 (-0.45, 0.36) p=0.828             |                                                                                  |
| <b>Myocardial haemorrhage presence (n/ total) (a)</b> |              |                     |                               |                               |                                   |                                  |                                                                                  |                                         |                                                                                  |
| <i>Anterior-MI:</i>                                   | TIMI flow ≤2 | 7/21 (33.3)         | 10/19 (52.6)                  | 15/27 (55.6)                  | 2.22 (0.62, 7.98) p=0.221         | 2.50 (0.77, 8.16) p=0.129        | 0.245                                                                            | 2.38 (0.83, 7.32) p=0.114               | 0.102                                                                            |
|                                                       | TIMI 3 flow  | 17/34 (50.0)        | 15/33 (45.5)                  | 12/29 (41.4)                  | 0.83 (0.32, 2.18) p=0.710         | 0.71 (0.26, 1.92) p=0.494        |                                                                                  | 0.77 (0.33, 1.79) p=0.544               |                                                                                  |
| <i>Non-anterior MI:</i>                               | TIMI flow ≤2 | 4/19 (21.1)         | 12/19 (63.2)                  | 11/22 (50.0)                  | 6.43 (1.62, 30.35) <b>p=0.012</b> | 3.75(0.99, 16.56) p=0.061        | <b>0.007</b>                                                                     | 4.79 (1.45, 19.13) <b>p=0.015</b>       | <b>0.003</b>                                                                     |
|                                                       | TIMI 3 flow  | 22/48 (45.8)        | 13/43 (30.2)                  | 18/52 (34.6)                  | 0.51 (0.22, 1.22) p=0.129         | 0.63 (0.28, 1.40) p=0.254        |                                                                                  | 0.57 (0.28, 1.17) p=0.124               |                                                                                  |
| <b>Myocardial haemorrhage extent (% LV mass)† (c)</b> |              |                     |                               |                               |                                   |                                  |                                                                                  |                                         |                                                                                  |
| <i>Anterior-MI:</i>                                   | TIMI flow ≤2 | 2.9 ± 7.1           | 2.8 ± 4.0                     | 4.6 ± 6.4                     | -0.08 (-3.22, 3.05) p=0.959       | 1.74 (-1.10, 4.64) p=0.230       | 0.472                                                                            | 1.01 (-1.59, 3.61) p=0.447              | 0.752                                                                            |
|                                                       | TIMI 3 flow  | 1.6 ± 3.0           | 2.0 ± 3.4                     | 2.2 ± 5.2                     | 0.39 (-2.08, 2.87) p=0.757        | 0.55 (-2.01, 3.10) p=0.676       |                                                                                  | 0.46 (-1.71, 2.64) p=0.677              |                                                                                  |
| <i>Non-anterior MI:</i>                               | TIMI flow ≤2 | 0.4 ± 1.1           | 1.6 ± 2.5                     | 2.9 ± 4.9                     | 1.21 (-0.94, 3.36) p=0.272        | 2.52 (0.56, 4.47) <b>p=0.012</b> | 0.072                                                                            | 1.99 (0.23, 3.75) <b>p=0.028</b>        | 0.067                                                                            |
|                                                       | TIMI 3 flow  | 1.3 ± 2.7           | 1.6 ± 3.8                     | 1.1 ± 2.8                     | 0.28 (-1.04, 1.60) p=0.679        | -0.16 (-1.43, 1.11) p=0.804      |                                                                                  | 0.04 (-1.08, 1.16) p=0.944              |                                                                                  |

CONFIDENTIAL – EMBARGO APPLIES

17

| Infarct size (% LV mass) (c) |              |             |             |             |                              |                              |       |                              |       |
|------------------------------|--------------|-------------|-------------|-------------|------------------------------|------------------------------|-------|------------------------------|-------|
| Anterior-MI:                 | TIMI flow ≤2 | 33.4 ± 17.0 | 37.6 ± 11.5 | 35.3 ± 15.4 | 4.13 (-3.97, 12.23) p=0.319  | 1.91 (-5.80, 9.61) p=0.628   | 0.382 | 2.91 (-3.94, 9.75) p=0.407   | 0.180 |
|                              | TIMI 3 flow  | 331. ± 12.7 | 31.3 ± 12.0 | 28.4 ± 14.5 | -1.75 (-8.24, 4.75) p=0.598  | -4.71 (-11.36, 1.95) p=0.167 |       | -3.16 (-8.79, 2.47) p=0.272  |       |
| Non-anterior MI:             | TIMI flow ≤2 | 22.3 ± 11.4 | 25.8 ± 11.3 | 28.5 ± 8.3  | 3.57 (-2.35, 9.49) p=0.238   | 6.23 (0.45, 12.01) p=0.036   | 0.097 | 4.96 (-0.08, 10.01) p=0.055  | 0.045 |
|                              | TIMI 3 flow  | 20.8 ± 9.8  | 19.8 ± 8.8  | 19.5 ± 9.4  | -1.06 (-4.95, 2.83) p=0.595  | -1.34 (-5.11, 2.43) p=0.488  |       | -1.21 (-4.51, 2.1) p=0.475   |       |
| Myocardial salvage index (c) |              |             |             |             |                              |                              |       |                              |       |
| Anterior-MI:                 | TIMI flow ≤2 | 0.4 ± 0.2   | 0.3 ± 0.2   | 0.3 ± 0.2   | -0.09 (-0.22, 0.04) p=0.197  | -0.05 (-0.18, 0.08) p=0.434  | 0.217 | -0.07 (-0.18, 0.04) p=0.241  | 0.085 |
|                              | TIMI 3 flow  | 0.3 ± 0.2   | 0.4 ± 0.2   | 0.4 ± 0.3   | 0.05 (-0.06, 0.15) p=0.402   | 0.08 (-0.03, 0.18) p=0.173   |       | 0.06 (-0.03, 0.15) p=0.202   |       |
| Non-anterior MI:             | TIMI flow ≤2 | 0.4 ± 0.3   | 0.3 ± 0.3   | 0.2 ± 0.2   | -0.03 (-0.18, 0.12) p=0.676  | -0.13 (-0.28, 0.01) p=0.077  | 0.213 | -0.08 (-0.21, 0.04) p=0.196  | 0.231 |
|                              | TIMI 3 flow  | 0.4 ± 0.2   | 0.4 ± 0.2   | 0.4 ± 0.2   | 0.00 (-0.10, 0.10) p=0.990   | 0.02 (-0.08, 0.11) p=0.740   |       | 0.01 (-0.07, 0.09) p=0.836   |       |
| LV ejection fraction (%) (c) |              |             |             |             |                              |                              |       |                              |       |
| Anterior-MI:                 | TIMI flow ≤2 | 38.8 ± 12.6 | 39.8 ± 8.0  | 40.8 ± 8.8  | 0.96 (-4.10, 6.02) p=0.711   | 2.03 (-2.83, 6.9) p=0.414    | 0.969 | 1.54 (-2.77, 5.84) p=0.485   | 0.896 |
|                              | TIMI 3 flow  | 41.0 ± 8.4  | 41.3 ± 7.7  | 43.2 ± 7.0  | 0.29 (-3.81, 4.39) p=0.890   | 2.12 (-2.08, 6.32) p=0.323   |       | 1.16 (-2.39, 4.71) p=0.522   |       |
| Non-anterior MI:             | TIMI flow ≤2 | 48.4 ± 3.2  | 43.4 ± 9.5  | 44.7 ± 8.4  | -4.97 (-9.35, -0.59) p=0.027 | -3.69 (-7.92, 0.54) p=0.089  | 0.199 | -4.29 (-8.00, -0.57) p=0.025 | 0.093 |
|                              | TIMI 3 flow  | 47.4 ± 6.3  | 47.2 ± 6.1  | 46.8 ± 8.2  | -0.25 (-3.10, 2.59) p=0.861  | -0.69 (-3.47, 2.09) p=0.627  |       | -0.48 (-2.91, 1.94) p=0.697  |       |

(a) Treatment effect estimates reported as odds ratios between groups, from a logistic regression model.

(b) Treatment effect estimates reported as mean differences in square root transformed MVO extent between groups, from a linear regression model.

(c) Treatment effect estimates reported as mean differences between groups, from linear regression.

The p values and 95% CI have not been adjusted for multiplicity, therefore these analyses should be interpreted as exploratory and not definitive.

\* Missing data: MVO extent, or presence/ absence (n=38); myocardial haemorrhage extent (n=73); myocardial haemorrhage presence/ absence (n=55); infarct size, or myocardial salvage index (n=38); LV ejection fraction (n=34)

† Given the high proportion of participants with a 0 value for MVO amount (56% of participants), and myocardial haemorrhage amount (57% of participants) the median value for MVO and myocardial haemorrhage was 0 for all groups, while the mean (SDs) are not ideal summaries for these data. It has been reported as such for this reason.

Abbreviations: CI, confidence interval; CMR, cardiovascular magnetic resonance; LV, left ventricular; MI, myocardial infarction; MVO, microvascular obstruction; TIMI, Thrombolysis in Myocardial Infarction.

**Supplemental Table 4. Baseline characteristics according to availability of MVO data (complete vs. missing). Data are mean  $\pm$  SD, or n (%), unless otherwise stated.**

|                                                                  | MVO data available<br>(n=383) | MVO data missing<br>(n=38) | P-value      |
|------------------------------------------------------------------|-------------------------------|----------------------------|--------------|
| Age                                                              | 60.5 $\pm$ 10.0               | 61.9 $\pm$ 12.8            | 0.501        |
| Male                                                             | 327 (85%)                     | 31 (82%)                   | 0.482        |
| White                                                            | 359 (94%)                     | 37 (97%)                   | 0.715        |
| Asian                                                            | 22 (6%)                       | 1 (3%)                     | 0.710        |
| Body mass index (kg/m <sup>2</sup> )                             | 28.1 $\pm$ 4.9                | 29.1 $\pm$ 4.9             | 0.235        |
| Heart rate at presentation, beats/ min                           | 72.4 $\pm$ 19.1               | 75.2 $\pm$ 18.6            | 0.396        |
| Systolic blood pressure at presentation, mmHg                    | 133.8 $\pm$ 25.1              | 135.4 $\pm$ 27.3           | 0.730        |
| Diastolic blood pressure at presentation, mmHg                   | 81.1 $\pm$ 14.7               | 80.0 $\pm$ 16.0            | 0.683        |
| Anterior myocardial infarction                                   | 170 (44%)                     | 15 (40%)                   | 0.610        |
| Hypertension                                                     | 117 (31%)                     | 18 (47%)                   | <b>0.044</b> |
| Hypercholesterolemia                                             | 83 (22%)                      | 13 (34%)                   | 0.103        |
| Diabetes mellitus †                                              | 45 (12%)                      | 8 (21%)                    | 0.120        |
| Smoking:                                                         |                               |                            |              |
| Current                                                          | 176 (46%)                     | 21 (55%)                   | 0.308        |
| Former (stopped >3 months)                                       | 74 (19%)                      | 7 (18%)                    | 1.000        |
| Never                                                            | 133 (35%)                     | 10 (26%)                   | 0.370        |
| Pre-existing maintenance medication:                             |                               |                            |              |
| Aspirin                                                          | 54 (14%)                      | 9 (24%)                    | 0.148        |
| Statin                                                           | 77 (20%)                      | 14 (37%)                   | <b>0.023</b> |
| Beta blocker                                                     | 33 (9%)                       | 7 (18%)                    | 0.074        |
| ACE inhibitor or ARB                                             | 62 (16%)                      | 11 (29%)                   | 0.069        |
| Symptom onset to arrival at primary PCI centre, median (IQR) hrs | 2.2 (1.5, 3.2)                | 2.5 (1.7, 3.5)             | 0.354        |
| Arrival at primary PCI centre to reperfusion, median (IQR) hrs   | 0.4 (0.3, 0.6)                | 0.6 (0.4, 0.7)             | <b>0.002</b> |

CONFIDENTIAL – EMBARGO APPLIES

20

|                                     |              |              |       |  |
|-------------------------------------|--------------|--------------|-------|--|
| Initial blood results on admission: |              |              |       |  |
| Hemoglobin, g/dL                    | 145.6 ± 13.6 | 145.8 ± 10.3 | 0.892 |  |
| Platelet count, 10 <sup>3</sup> /μL | 260.6 ± 60.9 | 270.9 ± 80.4 | 0.486 |  |
| Creatinine, μmol/L                  | 80.9 ± 17.7  | 78.6 ± 18.6  | 0.546 |  |
| eGFR (ml/min/1.73m <sup>2</sup> )   | 90.1 ± 20.4  | 92.5 ± 28.5  | 0.679 |  |

**Supplemental Table 5. Procedure characteristics according to availability of MVO data (complete vs. missing). Data are mean  $\pm$  SD, or n (%), unless otherwise stated.**

|                                                       | MVO data available<br>(n=383) | MVO data missing<br>(n=38)  | P-value      |
|-------------------------------------------------------|-------------------------------|-----------------------------|--------------|
| Culprit artery:                                       |                               |                             |              |
| Left anterior descending                              | 176 (46%)                     | 15 (40%)                    | 0.497        |
| Circumflex                                            | 44 (12%)                      | 9 (24%)                     | <b>0.040</b> |
| Right coronary artery                                 | 163 (43%)                     | 14 (37%)                    | 0.606        |
| >50% stenosis in $\geq 2$ major coronary arteries     | 134 (35%)                     | 10 (26%)                    | 0.370        |
| Initial TIMI coronary flow grade:                     |                               |                             |              |
| $\leq 1$                                              | 337 (88%)                     | 30 (79%)                    | 0.126        |
| $\geq 2$                                              | 46 (12%)                      | 8 (21%)                     | 0.126        |
| Initial TIMI thrombus grade:                          |                               |                             |              |
| 3/4                                                   | 76 (20%)                      | 10 (26%)                    | 0.398        |
| 5                                                     | 307 (80%)                     | 28 (74%)                    | 0.398        |
| American Heart Association culprit lesion type A      | 287 (75%)                     | 30 (79%)                    | 0.695        |
| Culprit lesion plaque characterisation score $\geq 4$ | 292 (76%)                     | 29 (76%)                    | 0.100        |
| QCA lesion length pre-drug (mm)                       | 26.8 $\pm$ 11.4               | 25.0 $\pm$ 10.0             | 0.305        |
| Reperfusion achieved with balloon angioplasty         | 269 (70%)                     | 32 (84%)                    | 0.089        |
| Balloon angioplasty pre-stent                         | 354 (92%)                     | 34 (90%)                    | 0.523        |
| Study drug delivered with thrombectomy catheter       | 278 (73%)                     | 22 (58%)                    | 0.062        |
| Total number of stents deployed $\geq 2$              | 115 (30%)                     | 11 (29%)                    | 1.000        |
| Post-stent dilatation                                 | 337 (88%)                     | 29 (76%)                    | 0.072        |
| Total length of stents deployed from QCA (mm)         | 34.0 $\pm$ 14.4               | 32.8 $\pm$ 14.9             | 0.638        |
| QCA reference vessel diameter post-stent (mm)         | 3.2 $\pm$ 0.5                 | 3.2 $\pm$ 0.4               | 0.535        |
| Unfractionated heparin, median (IQR), U               | 10000.0<br>(75000.0, 13000.0) | 8750.0<br>(7125.0, 12000.0) | 0.135        |

CONFIDENTIAL – EMBARGO APPLIES

22

|                                       |              |              |       |
|---------------------------------------|--------------|--------------|-------|
| Activated clotting time (s)           | 281.7 ± 88.0 | 273.0 ± 94.0 | 0.673 |
| Intravenous morphine                  | 284 (74%)    | 27 (71%)     | 0.700 |
| Inhaled oxygen (%)                    | 55 (15%)     | 5 (15%)      | 1.000 |
| Glycoprotein IIb/IIIa antagonist (%)  | 57 (15%)     | 9 (27%)      | 0.091 |
| Duration of study drug infusion (min) | 6.5 (2%)     | 6.4 (2%)     | 0.679 |

**Supplemental Table 6. Analysis of CMR parameters 2–7 days after primary PCI, by subgroups of TIMI flow grade (2 vs. 3) immediately before study drug administration (adjusted for MI location [anterior vs. non-anterior]). Treatment effect estimates and interaction with treatment received are shown (see footnotes). Data are mean  $\pm$  SD, median [IQR], or n (%), unless otherwise stated.**

|                                                | Treatment group  |                         |                         | Treatment Effect            |                             | Interaction p-value (treatment as a 3-level categorical variable) | Treatment Effect                     | Interaction p-value (treatment as a 2-level categorical variable) |
|------------------------------------------------|------------------|-------------------------|-------------------------|-----------------------------|-----------------------------|-------------------------------------------------------------------|--------------------------------------|-------------------------------------------------------------------|
|                                                | Placebo (n=134)* | Alteplase 10mg (n=131)* | Alteplase 20mg (n=136)* | Alteplase 10mg vs. placebo  | Alteplase 20mg vs. placebo  |                                                                   | Alteplase (10mg or 20mg) Vs. placebo |                                                                   |
|                                                |                  |                         |                         | Estimate (95% CI) p-value   | Estimate (95% CI) p-value   |                                                                   | Estimate (95% CI), p-value           |                                                                   |
| MVO presence (n/ total) (a)                    |                  |                         |                         |                             |                             |                                                                   |                                      |                                                                   |
| TIMI 2 flow                                    | 13/36 (36.1)     | 22/37 (59.5)            | 21/43 (48.8)            | 2.58 (1.00, 6.65) p=0.051   | 1.66 (0.67, 4.13) p=0.257   | 0.153                                                             | 2.06 (0.92, 4.62) p=0.081            | 0.022                                                             |
| TIMI 3 flow                                    | 41/85 (48.2)     | 29/80 (36.3)            | 33/83 (39.8)            | 0.61 (0.33, 1.14) p=0.119   | 0.72 (0.39, 1.34) p=0.298   |                                                                   | 0.66 (0.39, 1.13) p=0.128            |                                                                   |
| MVO extent (% of LV mass)† (b)                 |                  |                         |                         |                             |                             |                                                                   |                                      |                                                                   |
| TIMI 2 flow                                    | 3.0 ± 6.2        | 2.8 ± 3.9               | 5.2 ± 7.2               | 0.26 (-0.36, 0.89) p=0.405  | 0.55 (-0.18, 1.27) p=0.136  | 0.243                                                             | 0.43 (-0.17, 1.02) p=0.158           | 0.107                                                             |
| TIMI 3 flow                                    | 2.2 ± 3.4        | 2.4 ± 4.8               | 2.3 ± 4.3               | -0.09 (-0.49, 0.31) p=0.661 | -0.06 (-0.45, 0.34) p=0.777 |                                                                   | -0.07 (-0.42, 0.27) p=0.677          |                                                                   |
| Myocardial haemorrhage presence (n/ total) (a) |                  |                         |                         |                             |                             |                                                                   |                                      |                                                                   |
| TIMI 2 flow                                    | 10/33 (30.0)     | 20/35 (57.1)            | 21/43 (48.8)            | 3.05 (1.12, 8.31) p=0.029   | 2.14 (0.82, 5.62) p=0.121   | 0.054                                                             | 2.55 (1.07, 6.06) p=0.034            | 0.009                                                             |
| TIMI 3 flow                                    | 39/82 (47.6)     | 28/76 (36.8)            | 30/81 (37.0)            | 0.64 (0.34, 1.21) p=0.168   | 0.66 (0.35, 1.23) p=0.188   |                                                                   | 0.65 (0.38, 1.11) p=0.117            |                                                                   |
| Myocardial haemorrhage extent (% LV mass)† (c) |                  |                         |                         |                             |                             |                                                                   |                                      |                                                                   |
| TIMI 2 flow                                    | 2.0 ± 5.7        | 2.0 ± 2.9               | 4.2 ± 6.0               | 1.95 (-0.33, 4.24) p=0.093  | 1.98 (-0.74, 4.69) p=0.151  | 0.132                                                             | 0.50 (-0.04, 3.04) p=0.287           | 0.362                                                             |
| TIMI 3 flow                                    | 1.4 ± 2.8        | 1.8 ± 3.6               | 1.5 ± 3.8               | 0.29 (-1.00, 1.58) p=0.656  | 0.11 (-1.16, 1.38) p=0.867  |                                                                   | 0.20 (-0.91, 1.31) p=0.726           |                                                                   |
| Infarct size (% LV mass) (c)                   |                  |                         |                         |                             |                             |                                                                   |                                      |                                                                   |
| TIMI 2 flow                                    | 28.5 ± 16.4      | 30.5 ± 12.7             | 31.9 ± 13.5             | 2.46 (-3.91, 8.82) p=0.445  | 3.00 (-3.48, 9.48) p=0.359  | 0.158                                                             | 2.69 (-2.67, 8.04) p=0.322           | 0.085                                                             |
| TIMI 3 flow                                    | 26.0 ± 12.6      | 24.7 ± 11.7             | 22.8 ± 12.3             | -1.35 (-4.92, 2.22) p=0.460 | -2.68 (-6.22, 0.86) p=0.138 |                                                                   | -2.03 (-5.09, 1.03) p=0.195          |                                                                   |
| Myocardial salvage index (c)                   |                  |                         |                         |                             |                             |                                                                   |                                      |                                                                   |
| TIMI 2 flow                                    | 0.4 ± 0.3        | 0.3 ± 0.2               | 0.3 ± 0.2               | -0.05 (-0.17, 0.08) p=0.464 | -0.07 (-0.18, 0.04) p=0.205 | 0.201                                                             | -0.06 (-0.15, 0.04) p=0.245          | 0.117                                                             |
| TIMI 3 flow                                    | 0.4 ± 0.2        | 0.4 ± 0.2               | 0.4 ± 0.2               | 0.02 (-0.05, 0.09) p=0.593  | 0.04 (-0.03, 0.11) p=0.254  |                                                                   | 0.03 (-0.03, 0.09) p=0.329           |                                                                   |



**Supplemental Table 7. Analysis of MVO extent (% LV mass) 2-7 days after primary PCI, by subgroups of TIMI flow grade ( $\leq 2$  vs. 3) immediately before study drug administration, with treatment effects derived by bootstrapping (10,000 replicates, stratified by the location of myocardial infarction).**

|                    | Treatment Effect on MVO extent |                                  | Treatment Effect on MVO extent       |
|--------------------|--------------------------------|----------------------------------|--------------------------------------|
|                    | Alteplase 10mg vs placebo      | Alteplase 20mg vs. placebo       | Alteplase (10mg or 20mg) vs. placebo |
|                    | Estimate (95% CI) p-value      | Estimate (95% CI) p-value        | Estimate (95% CI), p-value           |
| TIMI flow $\leq 2$ | 2.19 (-1.40, 4.08) p=0.284     | 3.37 (0.77, 6.89) <b>p=0.016</b> | 2.80 (-0.09, 5.51) p=0.057           |
| TIMI 3 flow        | 1.96 (-0.65, 3.20) p=0.237     | 1.91 (-0.74, 3.01) p=0.287       | 1.99 (-0.57, 2.92) p=0.246           |

Missing data: MVO extent (n=38).

**Supplemental Table 8. Analysis of electrocardiographic, biochemical and angiographic parameters, by subgroups of TIMI flow grade ( $\leq 2$  vs. 3) at the time of study drug administration (adjusted for MI location [anterior vs. non-anterior]). Treatment effect estimates and interaction with treatment received are shown (see footnotes). Data are mean  $\pm$  SD, median [IQR], or n (%), unless otherwise stated.**

| Treatment Group                             |                                |                                |                            | Treatment Effect                 |                                         | Interaction<br>p-value<br>(treatment<br>as a 3-level<br>categorical<br>variable) | Treatment Effect                                       | Interaction |
|---------------------------------------------|--------------------------------|--------------------------------|----------------------------|----------------------------------|-----------------------------------------|----------------------------------------------------------------------------------|--------------------------------------------------------|-------------|
| Placebo<br>(n=142)*                         | Alteplase<br>10 mg<br>(n=136)* | Alteplase<br>20 mg<br>(n=143)* | Alteplase 10mg vs. placebo | Alteplase 20mg vs. placebo       | Alteplase (10mg or 20mg)<br>vs. placebo |                                                                                  | (treatment<br>as a 2-level<br>categorical<br>variable) |             |
|                                             |                                |                                | Estimate (95% CI) p-value  | Estimate (95% CI) p-value        | Estimate (95% CI),<br>p-value           |                                                                                  |                                                        |             |
| Absolute % ST-segment resolution 60 min (a) |                                |                                |                            |                                  |                                         |                                                                                  |                                                        |             |
| TIMI flow ≤2                                | 45.0 ± 44.3                    | 40.6 ± 52.1                    | 37.7 ± 43.3                | -4.43 (-21.96, 13.1) p=0.621     | -7.37 (-24.21, 9.47) p=0.392            | 0.671                                                                            | -6.02 (-20.91, 8.87) p=0.429                           | 0.789       |
| TIMI 3 flow                                 | 50.7± 36.4                     | 44.4 ± 41.8                    | 50.5 ± 46.0                | -6.89 (-20.50, 6.73) p=0.322     | -0.34 (-13.59, 12.91) p=0.960           |                                                                                  | -3.44 (-14.99, 8.11) p=0.560                           |             |
| Troponin T (ng/mL) AUC, 0–24 hours (b)      |                                |                                |                            |                                  |                                         |                                                                                  |                                                        |             |
| TIMI flow ≤2                                | 2.66 [1.10, 5.20]              | 2.94 [1.73, 6.86]              | 4.60 [1.20, 8.19]          | 1.67 (0.96, 2.89) p=0.071        | 1.83 (1.07, 3.12) <b>p=0.029</b>        | 0.662                                                                            | 1.75 (1.09, 2.80) <b>p=0.021</b>                       | 0.402       |
| TIMI 3 flow                                 | 3.16 [1.16, 5.76]              | 2.67 [1.53, 5.71]              | 3.47 [1.57, 6.30]          | 1.38 (0.92, 2.08) p=0.120        | 1.34 (0.90, 2.00) p=0.151               |                                                                                  | 1.36 (0.96, 1.92) p=0.082                              |             |
| TIMI coronary flow grade post-PCI ≤2 (c)    |                                |                                |                            |                                  |                                         |                                                                                  |                                                        |             |
| TIMI flow ≤2                                | 19 (38.0)                      | 15 (30.6)                      | 22 (40.0)                  | 0.72 (0.31, 1.66) p=0.432        | 1.09 (0.50, 2.39) p=0.838               | 0.134                                                                            | 0.90 (0.45, 1.81) p=0.762                              | 0.071       |
| TIMI 3 flow                                 | 5 (5.4)                        | 12 (13.8)                      | 11 (12.5)                  | 2.80 (0.95, 8.34) p=0.064        | 2.53 (0.84, 7.61) p=0.099               |                                                                                  | 2.66 (0.98, 7.27) p=0.056                              |             |
| Corrected TIMI frame count post-PCI (b)     |                                |                                |                            |                                  |                                         |                                                                                  |                                                        |             |
| TIMI flow ≤2                                | 26.5 [17.4, 39.4]              | 22.4 [15.5, 35.9]              | 28.0 [21.8, 40.5]          | 0.91 (0.73, 1.13) p=0.372        | 1.07 (0.87, 1.32) p=0.534               | 0.095                                                                            | 0.99 (0.82, 1.19) p=0.902                              | 0.276       |
| TIMI 3 flow                                 | 17.7 [12.0, 24.0]              | 20.0 [14.0, 26.0]              | 17.4 [12.9, 24.0]          | 1.18 (1.00, 1.39) <b>p=0.049</b> | 1.08 (0.92, 1.26) p=0.377               |                                                                                  | 1.12 (0.98, 1.29) p=0.099                              |             |
| Myocardial perfusion grade post-PCI ≤1 (c)  |                                |                                |                            |                                  |                                         |                                                                                  |                                                        |             |
| TIMI flow ≤2                                | 24 (48.0)                      | 23 (46.9)                      | 33 (60.0)                  | 0.95 (0.42, 2.13) p=0.895        | 1.65 (0.75, 3.66) p=0.214               | 0.050                                                                            | 1.27 (0.63, 2.54) p=0.501                              | 0.634       |
| TIMI 3 flow                                 | 31 (33.7)                      | 36 (41.4)                      | 23 (26.1)                  | 1.43 (0.77, 2.65) p=0.264        | 0.71 (0.37, 1.37) p=0.308               |                                                                                  | 1.02 (0.59, 1.77) p=0.932                              |             |

(a) Treatment effect estimates reported as mean differences between groups.

(b) Data analysed on a logarithmic scale. Treatment effect estimates reported as relative difference between groups.

(c) Treatment effect estimates reported as odds ratios between groups, from a logistic regression model.

The p values and 95% CI have not been adjusted for multiplicity, therefore these analyses should be interpreted as exploratory and not definitive.

\*Missing data: % ST-segment resolution (n=43); Troponin AUC (n=115); corrected TIMI frame count post-PCI (n=2).

Abbreviations: AUC, area-under-the-curve; CI, confidence interval; IQR, interquartile range; MI, myocardial infarction; SD, standard deviation; PCI, percutaneous coronary intervention; TIMI, Thrombolysis in Myocardial Infarction.

**Supplemental Table 9. Analysis of coagulation variables, at 2 hours, at 24 hours, and at 24 hours compared to baseline, by subgroups of TIMI flow grade ( $\leq 2$  vs. 3) immediately before study drug administration (adjusted for MI location [anterior vs. non-anterior]). Treatment effect estimates and interaction with treatment received are shown (see footnotes). Data are median [IQR], unless otherwise stated.**

| Treatment Group                                           |                               |                               |                            | Treatment Effect              |                                         | Interaction<br>p-value<br>(treatment<br>as a 3-level<br>categorical<br>variable) | Treatment Effect              | Interaction<br>p-value<br>(treatment<br>as a 2-level<br>categorical<br>variable) |
|-----------------------------------------------------------|-------------------------------|-------------------------------|----------------------------|-------------------------------|-----------------------------------------|----------------------------------------------------------------------------------|-------------------------------|----------------------------------------------------------------------------------|
| Placebo<br>(n=142)*                                       | Alteplase<br>10mg<br>(n=136)* | Alteplase<br>20mg<br>(n=143)* | Alteplase 10mg vs. placebo | Alteplase 20mg vs. placebo    | Alteplase (10mg or 20mg) vs.<br>placebo |                                                                                  |                               |                                                                                  |
|                                                           |                               |                               | Estimate (95% CI) p-value  | Estimate (95% CI) p-value     |                                         |                                                                                  | Estimate (95% CI), p-value    |                                                                                  |
| Fibrinogen (g/L) 2 hours post-PCI (a)                     |                               |                               |                            |                               |                                         |                                                                                  |                               |                                                                                  |
| TIMI flow ≤2                                              | 3.3 [2.7, 4.0]                | 3.2 [2.6, 3.6]                | 3.1 [2.7, 3.6]             | 0.98 (0.88, 1.1) p=0.784      | 0.94 (0.84, 1.05) p=0.250               | 0.684                                                                            | 0.96 (0.87, 1.05) p=0.391     | 0.955                                                                            |
| TIMI 3 flow                                               | 3.3 [2.8, 3.9]                | 3.0 [2.6, 3.8]                | 3.3 [2.8, 3.7]             | 0.96 (0.88, 1.04) p=0.279     | 0.97 (0.89, 1.05) p=0.441               |                                                                                  | 0.96 (0.90, 1.03) p=0.282     |                                                                                  |
| Plasminogen (U/dL) 2 hours post-PCI (b)                   |                               |                               |                            |                               |                                         |                                                                                  |                               |                                                                                  |
| TIMI flow ≤2                                              | 95.0 [88.3, 101.0]            | 91.0 [81.5, 100.8]            | 83.5 [74.8, 92.0]          | -2.66 (-8.56, 3.25) p=0.378   | -10.88 (-16.52, -5.25) p<0.001          | 0.378                                                                            | -7.16 (-12.23, -2.09) p=0.006 | 0.623                                                                            |
| TIMI 3 flow                                               | 96.0 [87.0, 104.5]            | 88.0 [80.0, 98.0]             | 84.0 [77.0, 92.0]          | -6.90 (-11.20, -2.66) p=0.002 | 10.49 (-14.73, -6.25) p<0.001           |                                                                                  | -8.74 (-12.45, -5.03) p<0.001 |                                                                                  |
| Fibrin D-dimer (ng/mL) 2 hours post-PCI (a)               |                               |                               |                            |                               |                                         |                                                                                  |                               |                                                                                  |
| TIMI flow ≤2                                              | 101.0 [69.5, 138.3]           | 319.5 [215.5, 633.0]          | 513.5 [266.8, 831.5]       | 3.64 (2.53, 5.22) p<0.001     | 4.91 (3.48, 6.93) p<0.001               | 0.563                                                                            | 4.29 (3.15, 5.83) p<0.001     | 0.299                                                                            |
| TIMI 3 flow                                               | 117.0 [74.8, 169.0]           | 354.0 [224.0, 593.0]          | 421.0 [275.5, 641.5]       | 3.15 (2.43, 4.09) p<0.001     | 3.88 (3.00, 5.03) p<0.001               |                                                                                  | 3.50 (2.80, 4.39) p<0.001     |                                                                                  |
| Prothrombin fragment F1+2 (pmol/L) 2 hours post-PCI (a)   |                               |                               |                            |                               |                                         |                                                                                  |                               |                                                                                  |
| TIMI flow ≤2                                              | 165.0 [134.0, 220.8]          | 161.1 [124.9, 260.8]          | 201.5 [147.4, 303.0]       | 1.20 (0.92, 1.57) p=0.183     | 1.22 (0.94, 1.57) p=0.136               | 0.909                                                                            | 1.21 (0.96, 1.52) p=0.103     | 0.925                                                                            |
| TIMI 3 flow                                               | 155.5 [124.1, 267.0]          | 200.3 [144.0, 328.2]          | 199.1 [153.2, 303.0]       | 1.26 (1.04, 1.53) p=0.019     | 1.19 (0.98, 1.44) p=0.078               |                                                                                  | 1.23 (1.04, 1.45) p=0.017     |                                                                                  |
| Tissue plasminogen activator (ng/mL) 2 hours post-PCI (a) |                               |                               |                            |                               |                                         |                                                                                  |                               |                                                                                  |
| TIMI flow ≤2                                              | 11.0 [8.3, 13.0]              | 14.0 [11.0, 16.0]             | 15.0 [12.0, 19.3]          | 1.26 (1.00, 1.59) p=0.056     | 1.45 (1.16, 1.82) p=0.001               | 0.977                                                                            | 1.36 (1.11, 1.66) p=0.003     | 0.869                                                                            |
| TIMI 3 flow                                               | 11.0 [9.0, 13.0]              | 13.0 [11.0, 17.0]             | 14.0 [12.0, 16.5]          | 1.30 (1.10, 1.54) p=0.003     | 1.48 (1.25, 1.76) p<0.001               |                                                                                  | 1.39 (1.20, 1.61) p<0.001     |                                                                                  |
| Fibrinogen (g/L) 24 hours post-PCI (a)                    |                               |                               |                            |                               |                                         |                                                                                  |                               |                                                                                  |
| TIMI flow ≤2                                              | 3.6 [3.0, 4.5]                | 3.6 [3.1, 4.4]                | 3.6 [3.0, 4.4]             | 1.03 (0.92, 1.16) p=0.576     | 0.99 (0.89, 1.11) p=0.927               | 0.384                                                                            | 1.01 (0.92, 1.12) p=0.791     | 0.176                                                                            |
| TIMI 3 flow                                               | 3.8 [3.3, 4.6]                | 3.5 [2.8, 4.3]                | 3.5 [3.0, 4.1]             | 0.94 (0.86, 1.02) p=0.143     | 0.92 (0.85, 1.00) p=0.063               |                                                                                  | 0.93 (0.87, 1.00) p=0.052     |                                                                                  |
| Plasminogen (U/dL) 24 hours post-PCI (b)                  |                               |                               |                            |                               |                                         |                                                                                  |                               |                                                                                  |
| TIMI flow ≤2                                              | 91.0 [86.0, 102.0]            | 91.6 [84.8, 99.3]             | 86.0 [77.0, 94.0]          | 0.14 (0.00, 45.15) p=0.506    | 0.00 (0.00, 0.34) p=0.021               | 0.230                                                                            | 0.01 (0.00, 1.85) p=0.086     | 0.519                                                                            |
| TIMI 3 flow                                               | 96.0 [83.0, 107.0]            | 88.0 [77.0, 99.3]             | 90.0 [80.0, 96.0]          | 0.00 (0.00, 0.07) p=0.002     | 0.00 (0.00, 0.16) p=0.005               |                                                                                  | 0.00 (0.00, 0.06) p<0.001     |                                                                                  |

CONFIDENTIAL – EMBARGO APPLIES

28

|                                                                                     |                      |                      |                      |                               |                               |       |                              |       |  |
|-------------------------------------------------------------------------------------|----------------------|----------------------|----------------------|-------------------------------|-------------------------------|-------|------------------------------|-------|--|
| Fibrin D-dimer (ng/mL) 24 hours post-PCI (a)                                        |                      |                      |                      |                               |                               |       |                              |       |  |
| TIMI flow ≤2                                                                        | 103.0 [59.0, 150.0]  | 162.0 [112.0, 371.8] | 224.0 [151.0, 344.0] | 2.05 (1.46, 2.87) p<0.001     | 2.11 (1.51, 2.94) p<0.001     | 0.205 | 2.08 (1.55, 2.78) p<0.001    | 0.078 |  |
| TIMI 3 flow                                                                         | 130.0 [80.5, 201.5]  | 190.0 [112.8, 379.0] | 224.0 [133.0, 325.0] | 1.44 (1.13, 1.85) p=0.004     | 1.56 (1.23, 1.99) p<0.001     |       | 1.50 (1.22, 1.85) p<0.001    |       |  |
| Prothrombin fragment F <sub>1+2</sub> (pmol/L) 24 hours post-PCI (a)                |                      |                      |                      |                               |                               |       |                              |       |  |
| TIMI flow ≤2                                                                        | 197.0 [145.0, 262.2] | 191.7 [129.7, 297.3] | 204.0 [155.0, 321.0] | 1.04 (0.80, 1.36) p=0.750     | 1.21 (0.93, 1.58) p=0.159     | 0.643 | 1.13 (0.89, 1.42) p=0.319    | 0.802 |  |
| TIMI 3 flow                                                                         | 226.0 [153.6, 334.0] | 226.8 [173.5, 324.6] | 234.0 [166.4, 327.7] | 1.09 (0.89, 1.32) p=0.404     | 1.08 (0.89, 1.31) p=0.416     |       | 1.08 (0.92, 1.28) p=0.336    |       |  |
| Tissue plasminogen activator (ng/mL) 24 hours post-PCI (a)                          |                      |                      |                      |                               |                               |       |                              |       |  |
| TIMI flow ≤2                                                                        | 10.0 [8.0, 12.0]     | 11.0 [8.8, 12.0]     | 10.0 [8.0, 13.0]     | 1.02 (0.84, 1.24) p=0.829     | 1.05 (0.87, 1.28) p=0.594     | 0.803 | 1.04 (0.88, 1.23) p=0.666    | 0.627 |  |
| TIMI 3 flow                                                                         | 9.0 [7.0, 11.5]      | 10.0 [8.0, 12.0]     | 10.0 [8.0, 12.0]     | 1.04 (0.91, 1.20) p=0.549     | 1.14 (0.99, 1.31) p=0.068     |       | 1.09 (0.97, 1.23) p=0.152    |       |  |
| Ratio of fibrinogen at 24 hours relative to baseline (a)                            |                      |                      |                      |                               |                               |       |                              |       |  |
| TIMI flow ≤2                                                                        | 1.12 [1.00, 1.26]    | 1.17 [1.10, 1.35]    | 1.16 [1.00, 1.37]    | 1.08 (0.99, 1.17) p=0.077     | 1.05 (0.96, 1.14) p=0.296     | 0.040 | 1.06 (0.99, 1.14) p=0.107    | 0.013 |  |
| TIMI 3 flow                                                                         | 1.20 [1.00, 1.33]    | 1.10 [0.90, 1.35]    | 1.11 [1.00, 1.25]    | 0.95 (0.89, 1.01) p=0.101     | 0.95 (0.89, 1.00) p=0.071     |       | 0.95 (0.90, 1.00) p=0.044    |       |  |
| Change in plasminogen (U/dL) at 24 hours relative to baseline (b)                   |                      |                      |                      |                               |                               |       |                              |       |  |
| TIMI flow ≤2                                                                        | 1.0 [-4.0, 5.5]      | -3.0 [-9.0, 4.0]     | -6.0 [-11.5, -2.3]   | -2.57 (-6.46, 1.32) p=0.197   | -7.05 (-10.89, -3.21) p<0.001 | 0.074 | -4.87 (-8.25, -1.49) p=0.005 | 0.239 |  |
| TIMI 3 flow                                                                         | 2.0 [-3.0, 6.0]      | -6.5 [-10.3, 0.0]    | -7.0 [-11.8, -0.3]   | -7.52 (-10.36, -4.67) p<0.001 | -7.22 (-10.04, -4.40) p<0.001 |       | -7.37 (-9.81, -4.93) p<0.001 |       |  |
| Ratio of fibrin D-dimer at 24 hours relative to baseline (a)                        |                      |                      |                      |                               |                               |       |                              |       |  |
| TIMI flow ≤2                                                                        | 1.1 [0.8, 1.3]       | 1.8 [1.2, 3.3]       | 1.6 [1.0, 2.7]       | 2.01 (1.46, 2.77) p<0.001     | 1.67 (1.22, 2.30) p=0.002     | 0.019 | 1.83 (1.38, 2.42) p<0.001    | 0.249 |  |
| TIMI 3 flow                                                                         | 1.3 [0.9, 1.7]       | 1.7 [1.0, 2.5]       | 2.2 [1.4, 3.4]       | 1.26 (1.00, 1.59) p=0.055     | 1.76 (1.40, 2.22) p<0.001     |       | 1.49 (1.22, 1.83) p<0.001    |       |  |
| Ratio of prothrombin fragment F <sub>1+2</sub> at 24 hours relative to baseline (a) |                      |                      |                      |                               |                               |       |                              |       |  |
| TIMI flow ≤2                                                                        | 1.2 [1.0, 1.6]       | 1.5 [1.3, 2.0]       | 1.3 [1.0, 1.9]       | 1.26 (0.93, 1.71) p=0.134     | 1.23 (0.91, 1.66) p=0.173     | 0.520 | 1.25 (0.96, 1.62) p=0.103    | 0.200 |  |
| TIMI 3 flow                                                                         | 1.4 [0.9, 1.9]       | 1.4 [1.0, 1.6]       | 1.4 [1.2, 2.1]       | 0.87 (0.70, 1.09) p=0.219     | 1.16 (0.93, 1.45) p=0.182     |       | 1.01 (0.83, 1.22) p=0.937    |       |  |
| Ratio of tissue plasminogen activator at 24 hours relative to baseline (a)          |                      |                      |                      |                               |                               |       |                              |       |  |
| TIMI flow ≤2                                                                        | 1.1 [0.9, 1.3]       | 1.2 [1.0, 1.3]       | 1.1 [0.9, 1.3]       | 1.05 (0.78, 1.41) p=0.761     | 0.98 (0.73, 1.32) p=0.894     | 0.454 | 1.01 (0.78, 1.31) p=0.926    | 0.444 |  |
| TIMI 3 flow                                                                         | 0.9 [0.8, 1.2]       | 1.0 [0.8, 1.2]       | 1.1 [0.8, 1.4]       | 0.84 (0.68, 1.05) p=0.121     | 0.95 (0.76, 1.18) p=0.635     |       | 0.89 (0.74, 1.08) p=0.240    |       |  |

(a) Data analysed on a logarithmic scale. Treatment effect estimates reported as relative difference between groups.

(b) Treatment effect estimates reported as mean differences between groups.

The p values and 95% CI have not been adjusted for multiplicity, therefore these analyses should be interpreted as exploratory and not definitive.

\*Missing data: coagulation parameters 2 hours post-PCI (n=75); coagulation parameters 24 hours post-PCI (n=71); change in coagulation parameters at 24 hours relative to baseline (n=97).

Abbreviations: IQR, inter quartile range; MI, myocardial infarction; TIMI, Thrombolysis in Myocardial Infarction.

## References

1. TIMI Study Group. The Thrombolysis in Myocardial Infarction (TIMI) trial. Phase I findings. *The N Engl J Med* 1985;312(14):932-936.
2. Gibson CM, Murphy SA, Rizzo MJ, et al. Relationship between TIMI frame count and clinical outcomes after thrombolytic administration. Thrombolysis In Myocardial Infarction (TIMI) Study Group. *Circulation* 1999;99(15):1945-1950.
3. Gibson CM, de Lemos JA, Murphy SA, et al. Combination therapy with abciximab reduces angiographically evident thrombus in acute myocardial infarction: a TIMI 14 substudy. *Circulation* 2001;103(21):2550-2554.
4. Ellis SG, Vandormael MG, Cowley MJ et al. Coronary morphologic and clinical determinants of procedural outcome with angioplasty for multivessel coronary disease, implications for patient selection. Multivessel Angioplasty Prognosis Study Group. *Circulation* 1990; 82:1193-1202.
5. Keeley EC, Mehran R, Brener et al. Impact of multiple complex plaques on short- and long-term clinical outcomes in patients presenting with ST-segment elevation myocardial infarction (from the harmonising outcomes with revascularisation and stent in acute myocardial infarction [HORIZONS-AMI trial). *Am J Cardiol* 2014; 113(0):1621-1627.
6. Sorensson P, Heiberg E, Saleh N, et al. Assessment of myocardium at risk with contrast enhanced steady-state free precession cine cardiovascular magnetic resonance compared to single-photon emission computed tomography. *J Cardiovasc Magn Reson* 2010;12:25.
7. Anderson LJ, Holden S, Davis B, et al. Cardiovascular T2-star (T2\*) magnetic resonance for the early diagnosis of myocardial iron overload. *Eur Heart J* 2001;22(23):2171-2179.

8. Carrick D, Haig C, Ahmed N, et al. Myocardial hemorrhage after acute reperfused ST-segment-elevation myocardial infarction: relation to microvascular obstruction and prognostic significance. *Circ Cardiovasc Imaging* 2016;9(1):e004148.
